# Supplementary material for: AnFiSA: An open-source computational platform for the analysis of sequencing data for rare genetic disease
Source: bioRxiv or medRxiv preprint supplement (doi:10.1101/2021.09.26.21263358), 2021-12-02
Supplement: Supplementary file [file media-2.pdf]

# Initial Review: Notification of IRB Approval/Activation Protocol #: 2015P000904/MGH

Date: December 2, 2015

To: Richard Louis Maas, MD  
BWH  
Medicine / Genetics

Joel Krier, MD, MSC  
BWH  
Medicine / Genetics

Lael Yonker  
MGH  
Pediatric Service

From: Partners Human Research Committee  
116 Huntington Avenue, Suite 1002  
Boston, MA 02116

Title of Protocol: Genomic Evaluation of Disease

Sponsor/Funding Support:

Proposal Title: Genetics Div. Discretionary  
Name: Sundry

---

Study Population: Adults  
Consent/Authorization: Required  
Documentation of Consent: Written  
Informed Consent From: Adult Subject  
Informed Consent By: Licensed Physician Investigator  
Non-Physician Investigator  
Other Study Staff

Study Population: Children  
Children Risk Assessment: 45 CFR 46.404  
Consent/Authorization: Required  
Documentation of Consent: Written  
Informed Consent From: One Parent/Guardian for Child

Informed Consent By: Licensed Physician Investigator  
Non-Physician Investigator  
Other Study Staff  
Assent: Required  
Documentation of Assent: Written Assent  
Assent From: Children Capable of Assent  
IRB Review Type: Full  
IRB Approval Date: 12/2/2015  
Approval Activation Date: 12/2/2015  
IRB Expiration Date: 11/10/2016

This project has been reviewed by MGH IRB . During the review of this project, the IRB specifically considered (i) the risks and anticipated benefits, if any, to subjects; (ii) the selection of subjects; (iii) the procedures for obtaining and documenting informed consent; (iv) the safety of subjects; and (v) the privacy of subjects and confidentiality of the data.

Please note that if an IRB member had a conflict of interest with regard to the review of this project, consistent with IRB policies and procedures, the member was required to leave the room during the discussion and vote on this project except to provide information requested by the IRB.

*The IRB has reviewed and approved the following documents:*

*Protocol Summary (version date 11/24/15)*

*Consent Form (2)*

*Assent Form (1)*

*Recruitment Letter (3)*

*Phone Script (2)*

*Instrument/Questionnaire (1)*

*Physician Letter*

*Post Skin Biopsy Care Instructions*

*BioBank Protocol Summary*

*Opt Out Card*

As Principal Investigator, you are responsible for ensuring that this project is conducted in compliance with all applicable federal, state and local laws and regulations, institutional policies, and requirements of the IRB, which include, but are not limited to, the following:

1. Submission of any and all proposed changes to this project (e.g., protocol, recruitment materials, consent form, status of the study, etc.) to the IRB for review and approval prior to initiation of the change(s), except where necessary to eliminate apparent immediate hazards to the subject(s). Changes made to eliminate apparent immediate hazards to subjects must be reported to the IRB as an unanticipated problem.
2. Submission of continuing review submissions for re-approval of the project prior to expiration of IRB approval and a final continuing review submission when the project has been completed.
3. Submission of any and all unanticipated problems, including adverse event(s) in accordance with the IRB's policy on reporting unanticipated problems including adverse events.
4. Obtaining informed consent from subjects or their legally authorized representative prior to initiation of research procedures when and as required by the IRB and, when applicable, documenting informed

consent using the current IRB approved consent form(s) with the IRB-approval stamp in the document footer.

5. Informing all investigators and study staff listed on the project of changes and unanticipated problems, including adverse events, involving risks to subjects or others.
6. When investigator financial disclosure forms are required, updating your financial interests in Insight and for informing all site responsible investigators, co-investigators and any other members of the study staff identified by you as being responsible for the design, conduct, or reporting of this research study of their obligation to update their financial interest disclosures in Insight if (a) they have acquired new financial interests related to the study and/or (b) any of their previously reported financial interests related to the study have changed.

**The IRB has the authority to terminate projects that are not in compliance with these requirements.**

Questions related to this project may be directed to Fred Syllien, [FSYLLIEN@PARTNERS.ORG](mailto:FSYLLIEN@PARTNERS.ORG), 617-424-4124.
